# Supplementary material for: Small proline-rich proteins (SPRRs) are epidermally produced antimicrobial proteins that defend the cutaneous barrier by direct bacterial membrane disruption
Source: eLife. 2022 Mar 2;11:e76729. doi: 10.7554/eLife.76729 (PMC8912919; doi:10.7554/eLife.76729)
Supplement: Figure 1—source data 1. [file elife-76729-fig1-data1.zip]

Archive with 8 entries (8 files):
- Figure 1-source data/Figur1GAPDHChenlu 2019-02-13 17h05m30s(Chemiluminescence) - Copy.jpg
- Figure 1-source data/Figur1GAPDHChenlu 2019-02-13 17h05m30s(Chemiluminescence) - Copy.pdf
- Figure 1-source data/Quantify WB band.xlsx
- Figure 1-source data/sprr1bChenlu 2019-02-13 17h10m17s(Chemiluminescence) - Copy.jpg
- Figure 1-source data/sprr1bChenlu 2019-02-13 17h10m17s(Chemiluminescence) - Copy.pdf
- Figure 1-source data/SPRR2aChenlu 2019-02-13 16h59m29s(Chemiluminescence) - Copy.jpg
- Figure 1-source data/SPRR2aChenlu 2019-02-13 16h59m29s(Chemiluminescence) - Copy.pdf
- Figure 1-source data/WB quantify data.pzfx
