# Supplementary material for: Small proline-rich proteins (SPRRs) are epidermally produced antimicrobial proteins that defend the cutaneous barrier by direct bacterial membrane disruption
Source: eLife journal article supplement (doi:10.7554/elife.76729), 2022-03-02
Supplement: supp [file Quantify WB band.xlsx]

## Sheet: Sheet1
	VEH1	VEH2	VEH3	VEH4	LPS1	LPS2	LPS3	LPS4
GAPDH	1	0.735623	0.961105	0.970476	0.820138	0.882217	0.721658	0.421164
sprr1b	1	0.540906	0.440623	0.442148	1.47702	0.945685	1.04764	1.14959
sprr1b/gapdh	1	0.735303	0.458455	0.455599	1.80094	1.07194	1.45171	2.72956
	VEH1	VEH2	VEH3	VEH4	LPS1	LPS2	LPS3	LPS4
GAPDH	1	0.735623	0.961105	0.970476	0.820138	0.882217	0.721658	0.421164
sprr2a	1	2.17656	0.826453	0.679263	2.92153	3.89674	5.12155	4.53869
sprr2a/gapdh	1	2.95879	0.859899	0.699928	3.56224	4.41698	7.09693	10.7766
