# Supplementary figures and images for: Small proline-rich proteins (SPRRs) are epidermally produced antimicrobial proteins that defend the cutaneous barrier by direct bacterial membrane disruption
Source: eLife journal article supplement (doi:10.7554/elife.76729), 2022-03-02

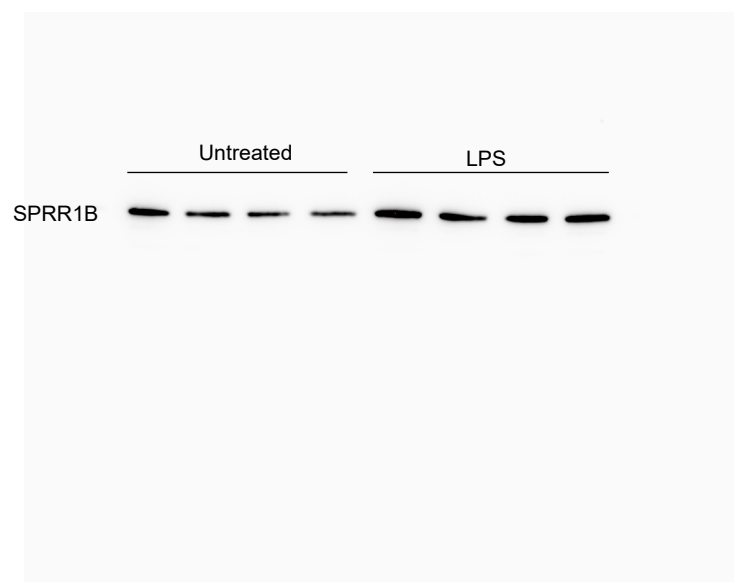

Supplement: fig1-data1 [file elife-76729-fig1-data1-v3.zip]

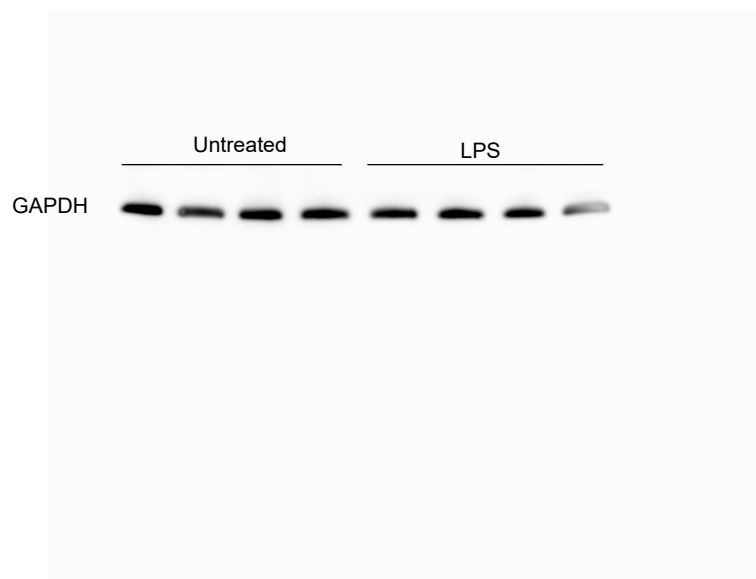

Supplement: fig1-data1 [file elife-76729-fig1-data1-v3.zip]

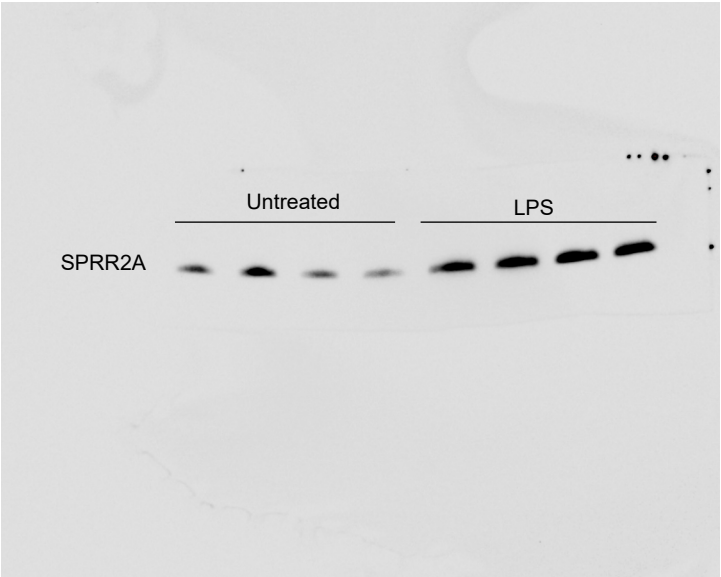

Supplement: fig1-data1 [file elife-76729-fig1-data1-v3.zip]

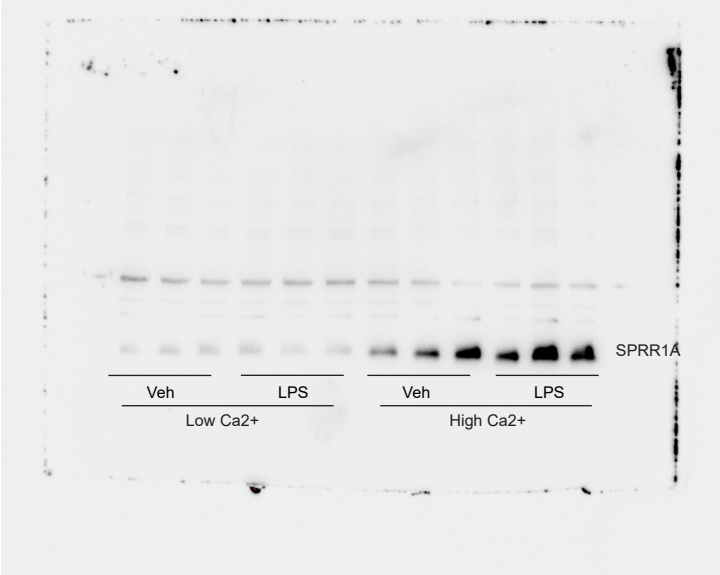

Supplement: fig2-figsupp2-data1 [file elife-76729-fig2-figsupp2-data1-v3.zip]

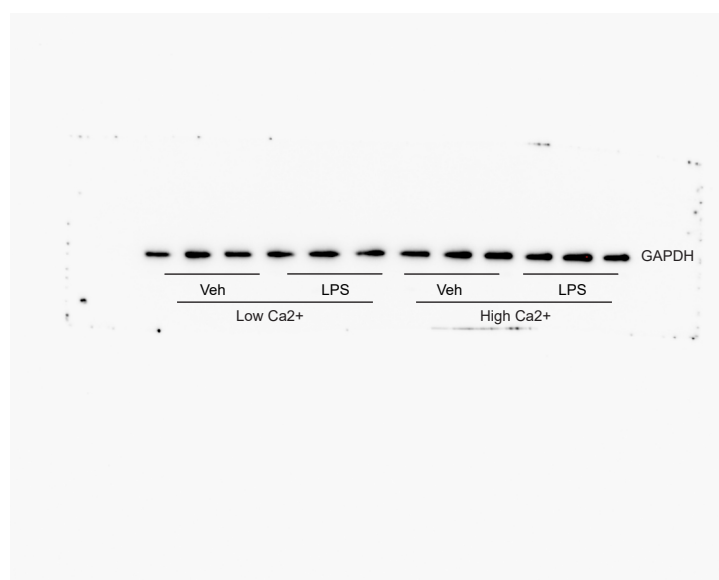

Supplement: fig2-figsupp2-data1 [file elife-76729-fig2-figsupp2-data1-v3.zip]

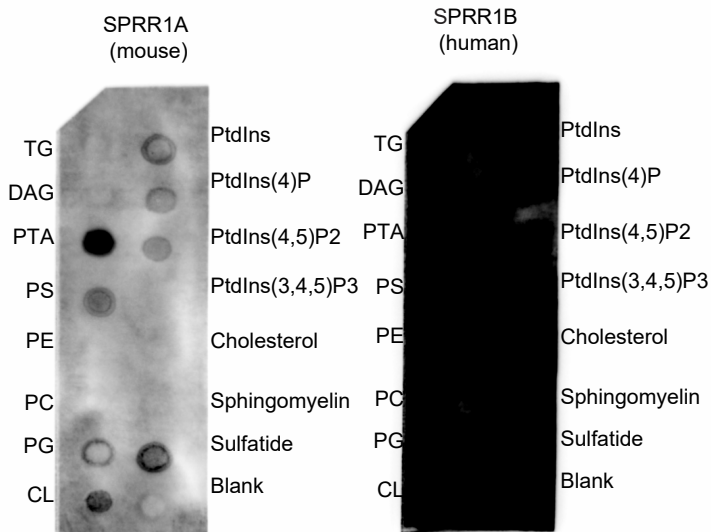

Supplement: fig3-data1 [file elife-76729-fig3-data1-v4.zip]

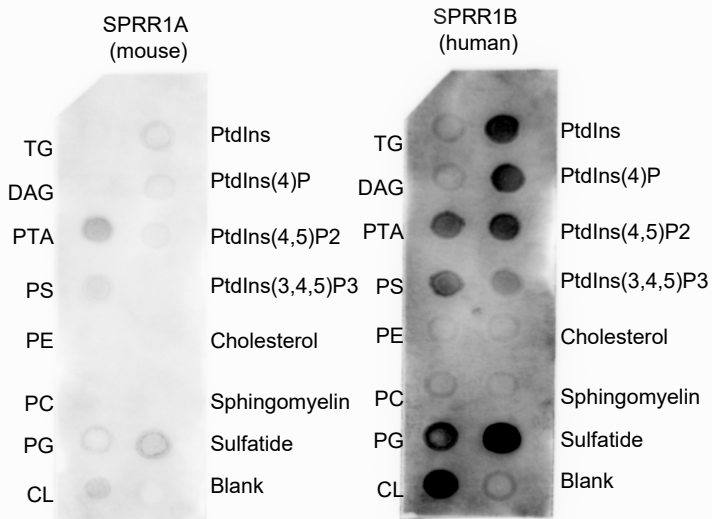

Supplement: fig3-data1 [file elife-76729-fig3-data1-v4.zip]

# SPRR1A (mouse)

250 -  
150 -  
100 -  
75 -  
50 -  
37 -  
25 -  
20 -  
15 -  
10 -  
(kDa)

9 10 11 12 13 14 15 16 17

Elution volume (mL)

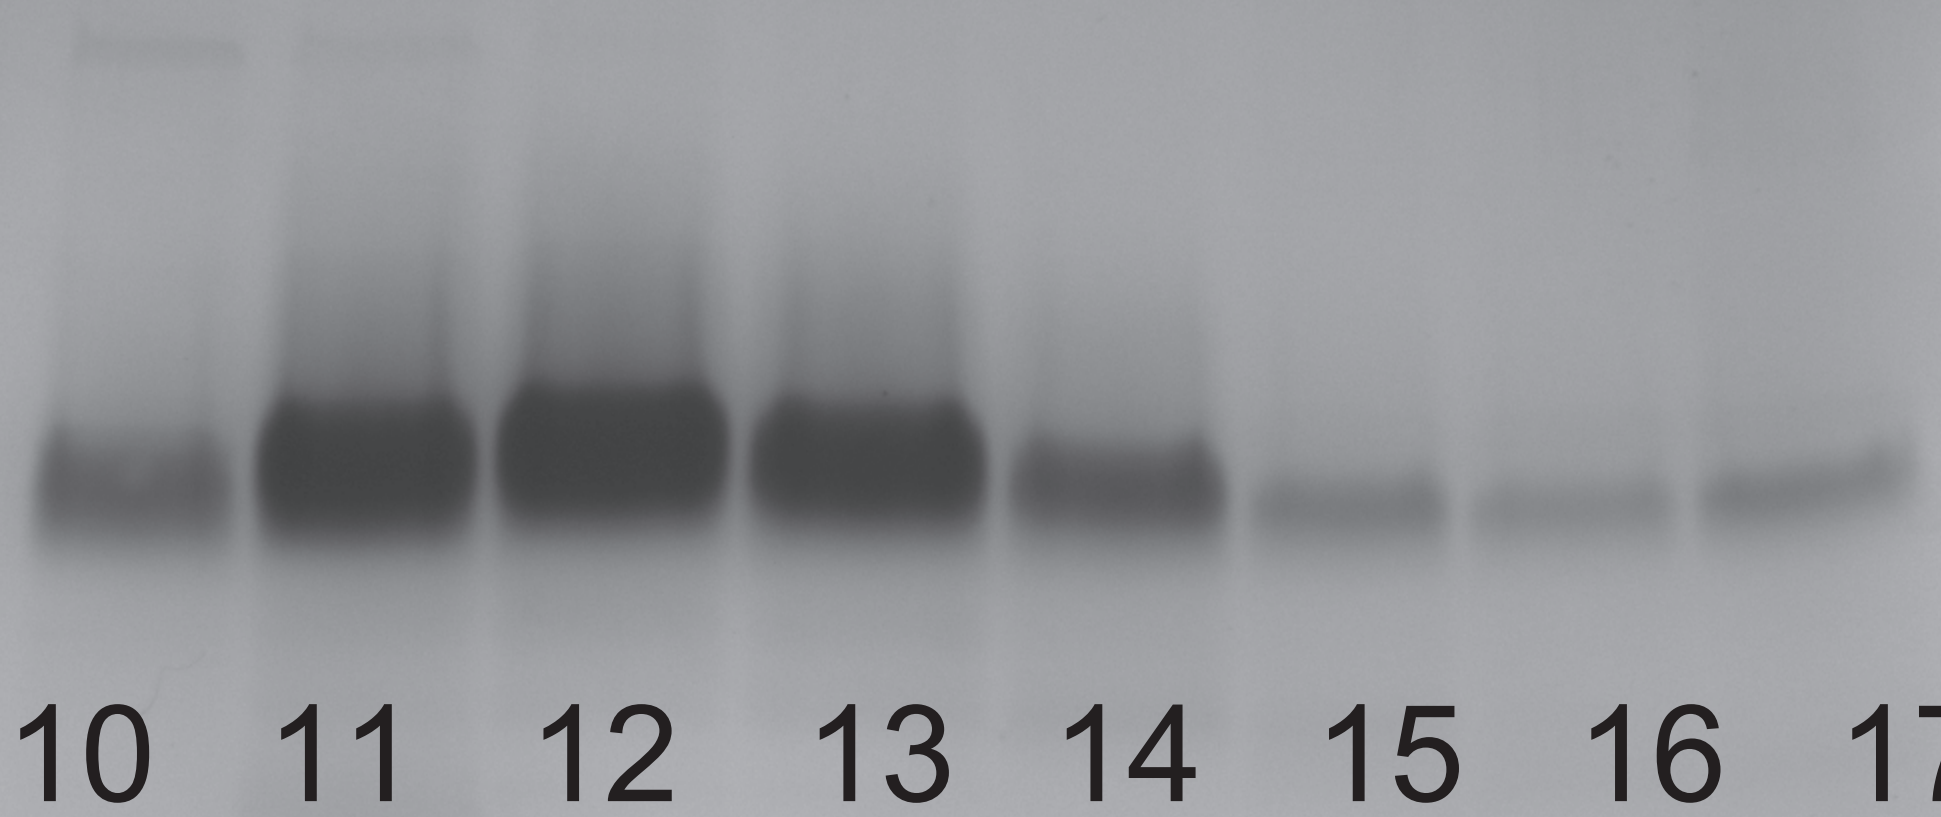

Supplement: fig3-figsupp1-data1 [file elife-76729-fig3-figsupp1-data1-v4.zip]

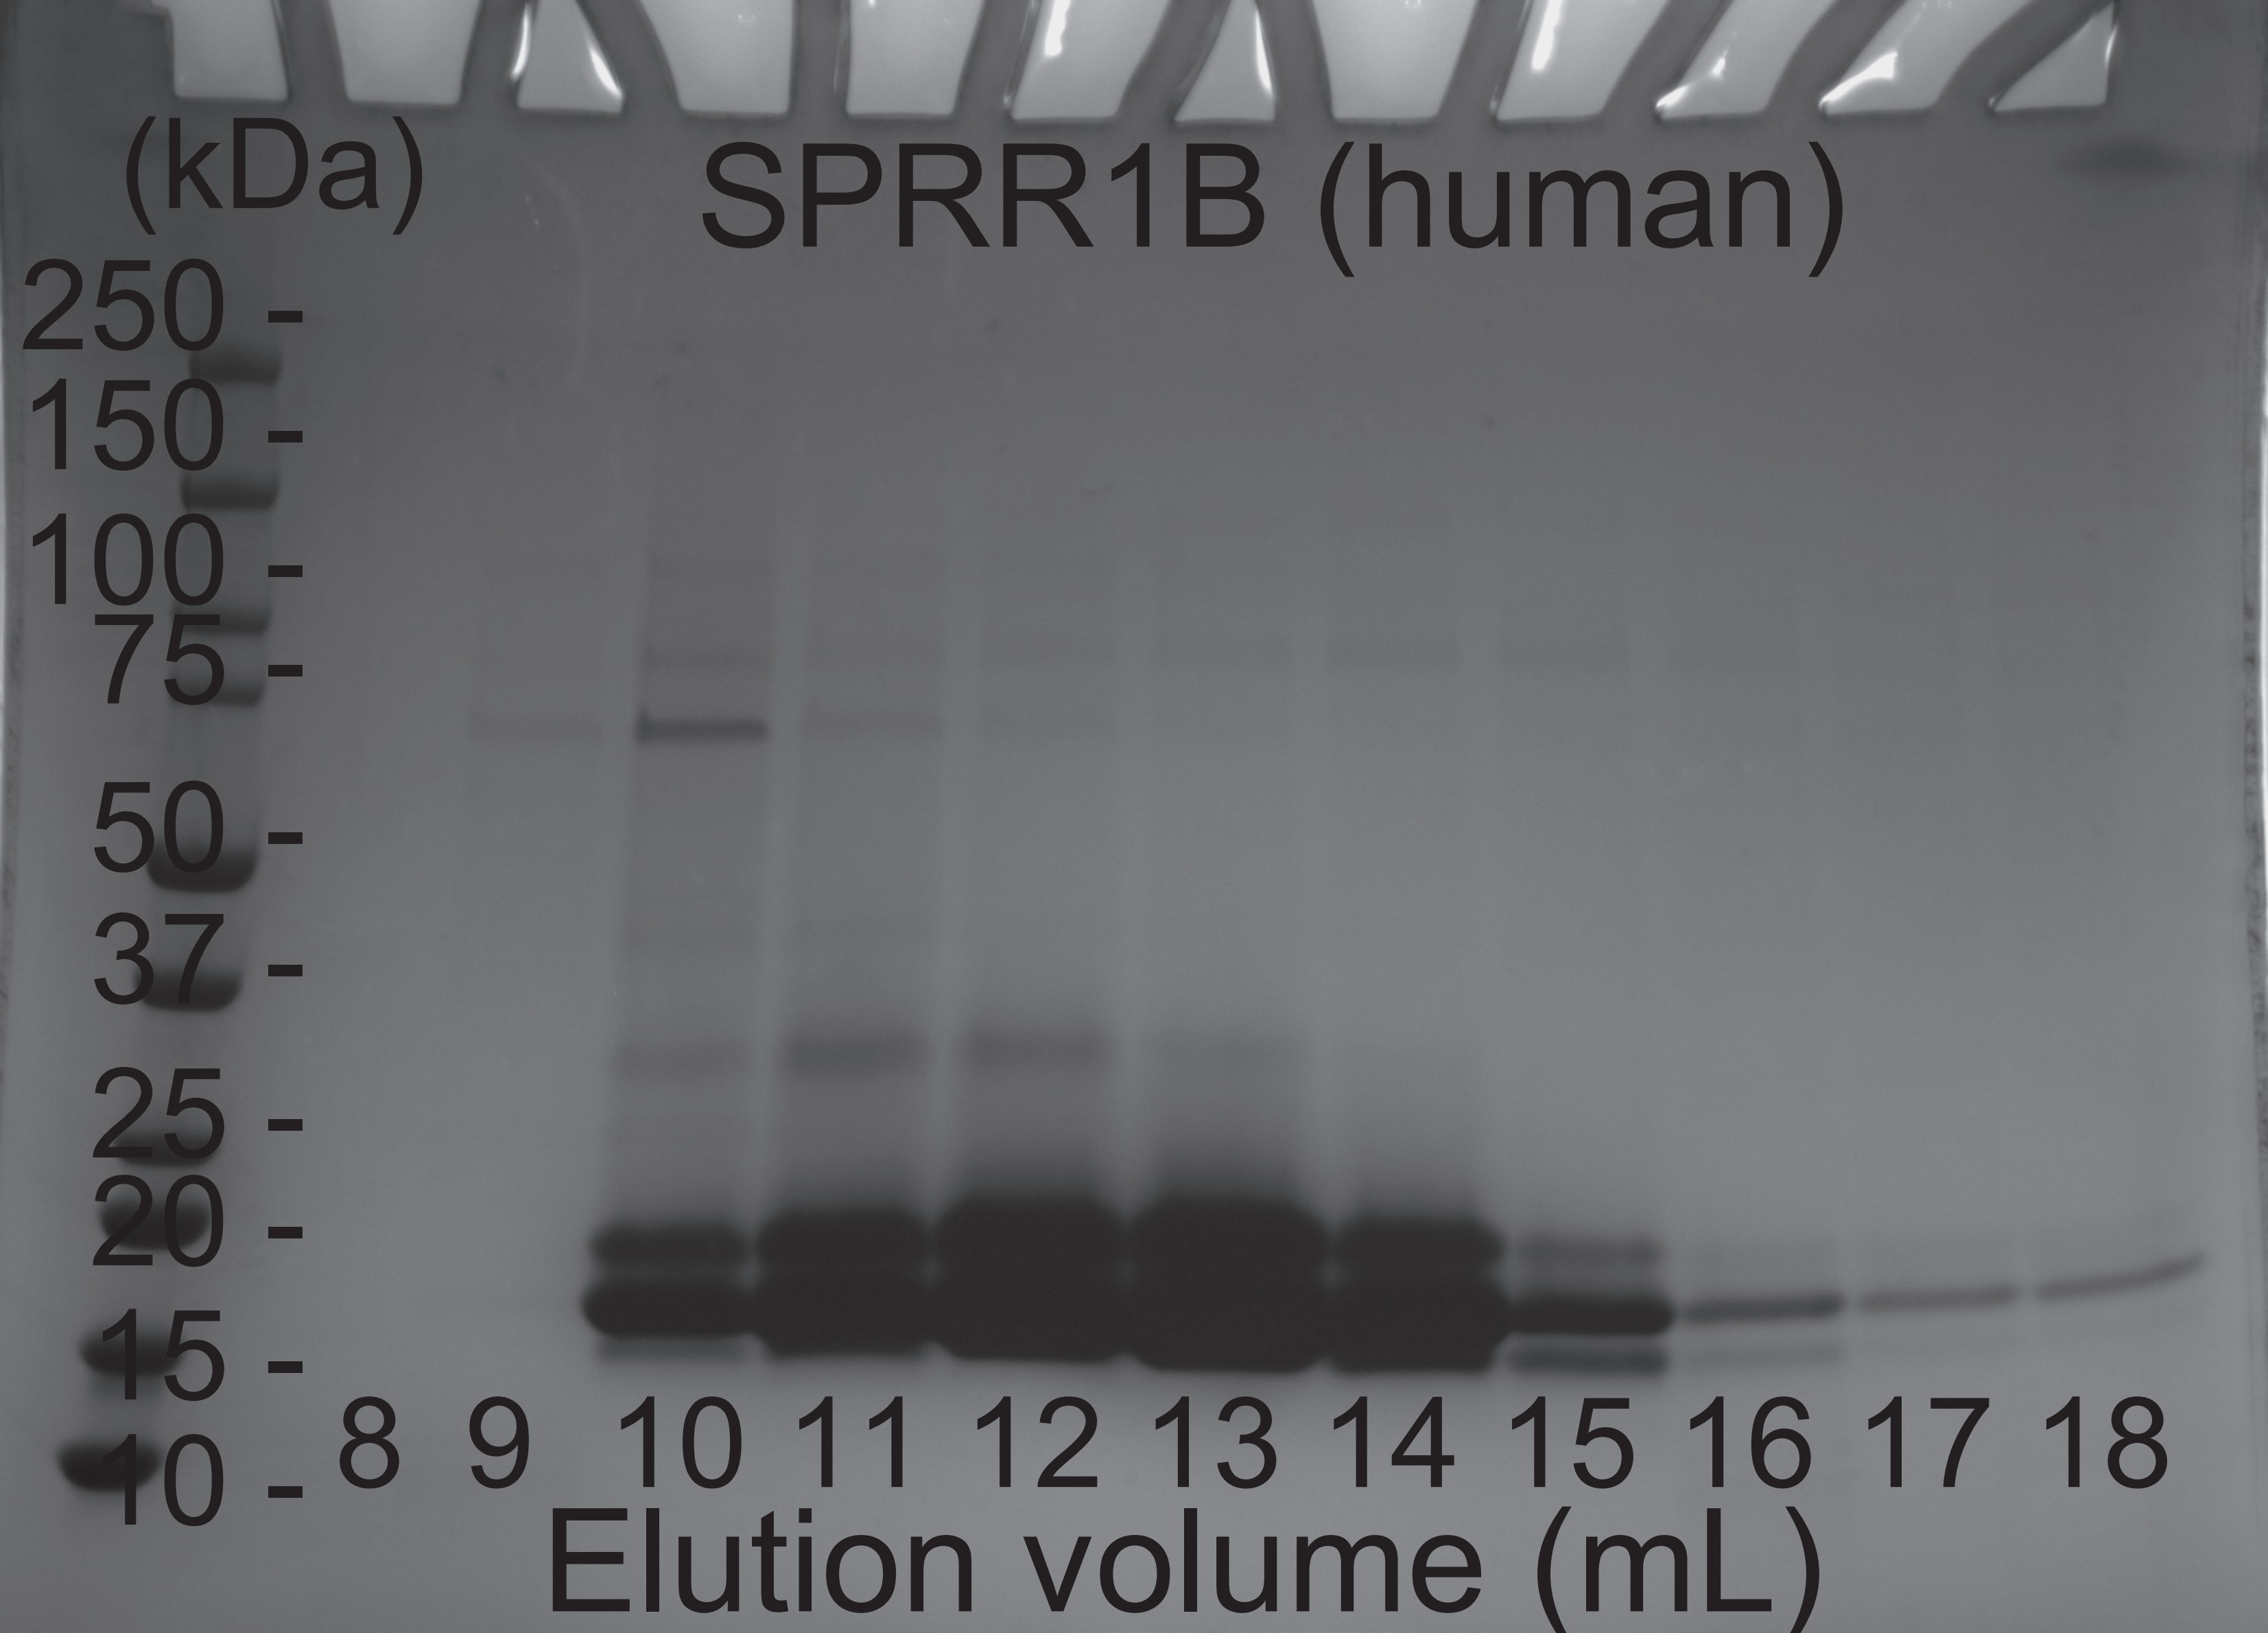

Supplement: fig3-figsupp1-data1 [file elife-76729-fig3-figsupp1-data1-v4.zip]

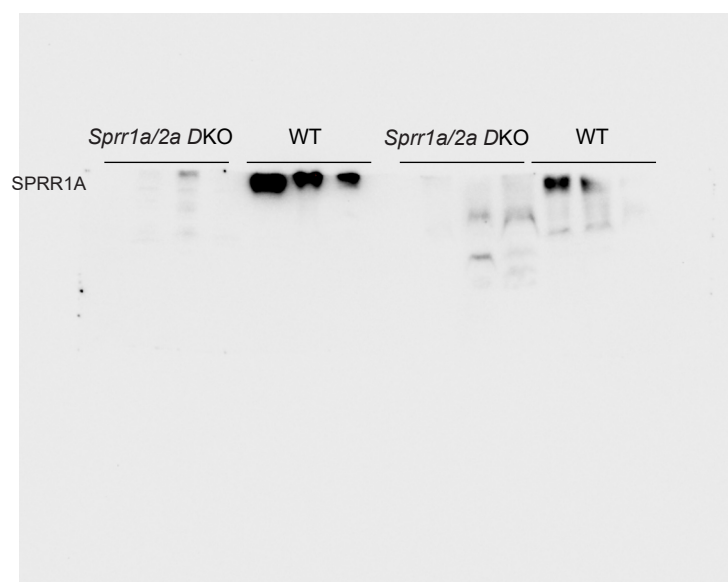

Supplement: fig4-figsupp1-data1 [file elife-76729-fig4-figsupp1-data1-v4.zip]

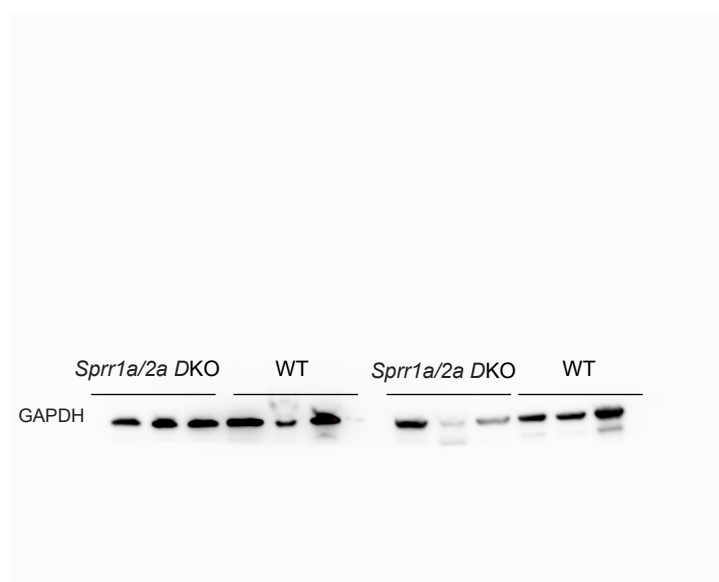

Supplement: fig4-figsupp1-data1 [file elife-76729-fig4-figsupp1-data1-v4.zip]
